# Supplementary material
Source: Springer Nature journal article supplement (https://www.springermedizin.de/resource/supplementary/12997_2008_34_MOESM2_ESM.pdf/9623174)

Patient #1 VC (AUC=92)

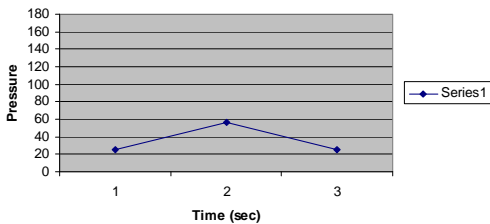

Patient #1 IRCT (AUC=125)

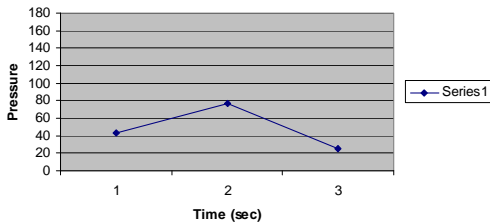

Patient #2 VC (AUC=290)

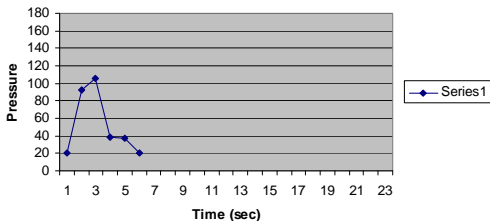

Patient #2 IRCT (AUC=781)

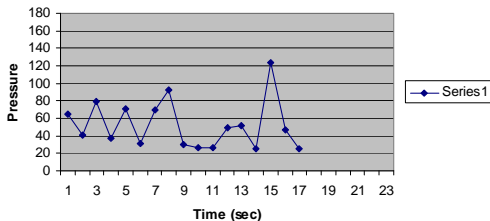

Patient #3 VC (AUC=326)

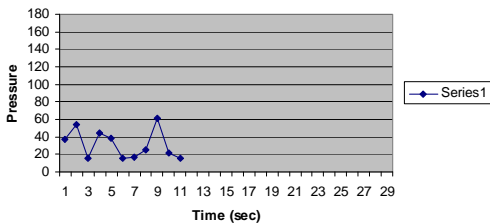

Patient #3 IRCT (AUC=1063)

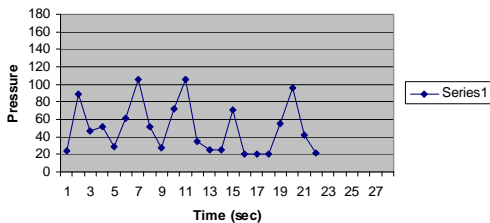

Patient #4 VC (AUC=375)

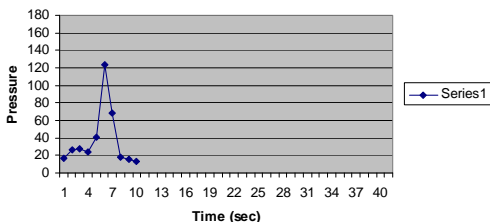

Patient #4 IRCT (AUC=1214)

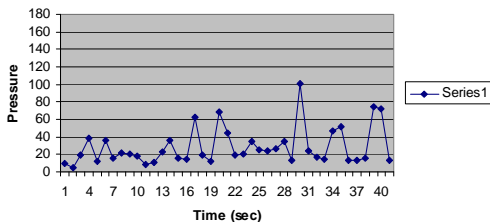

Patient #5 VC (AUC=612)

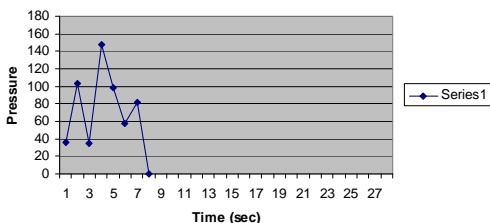

Patient #5 IRCT (AUC=1308)

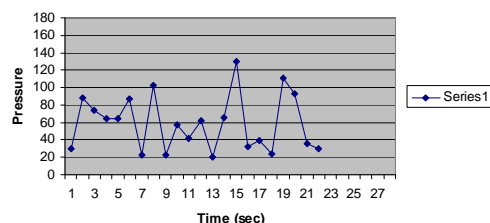

Supplement: MOESM2 [file 9623174]
